# Supplementary material for: A Compact Representation of Drawing Movements with Sequences of Parabolic Primitives
Source: PubMed Central journal article supplement (PMC2699652; doi:10.1371/journal.pcbi.1000427), 2009-07-03

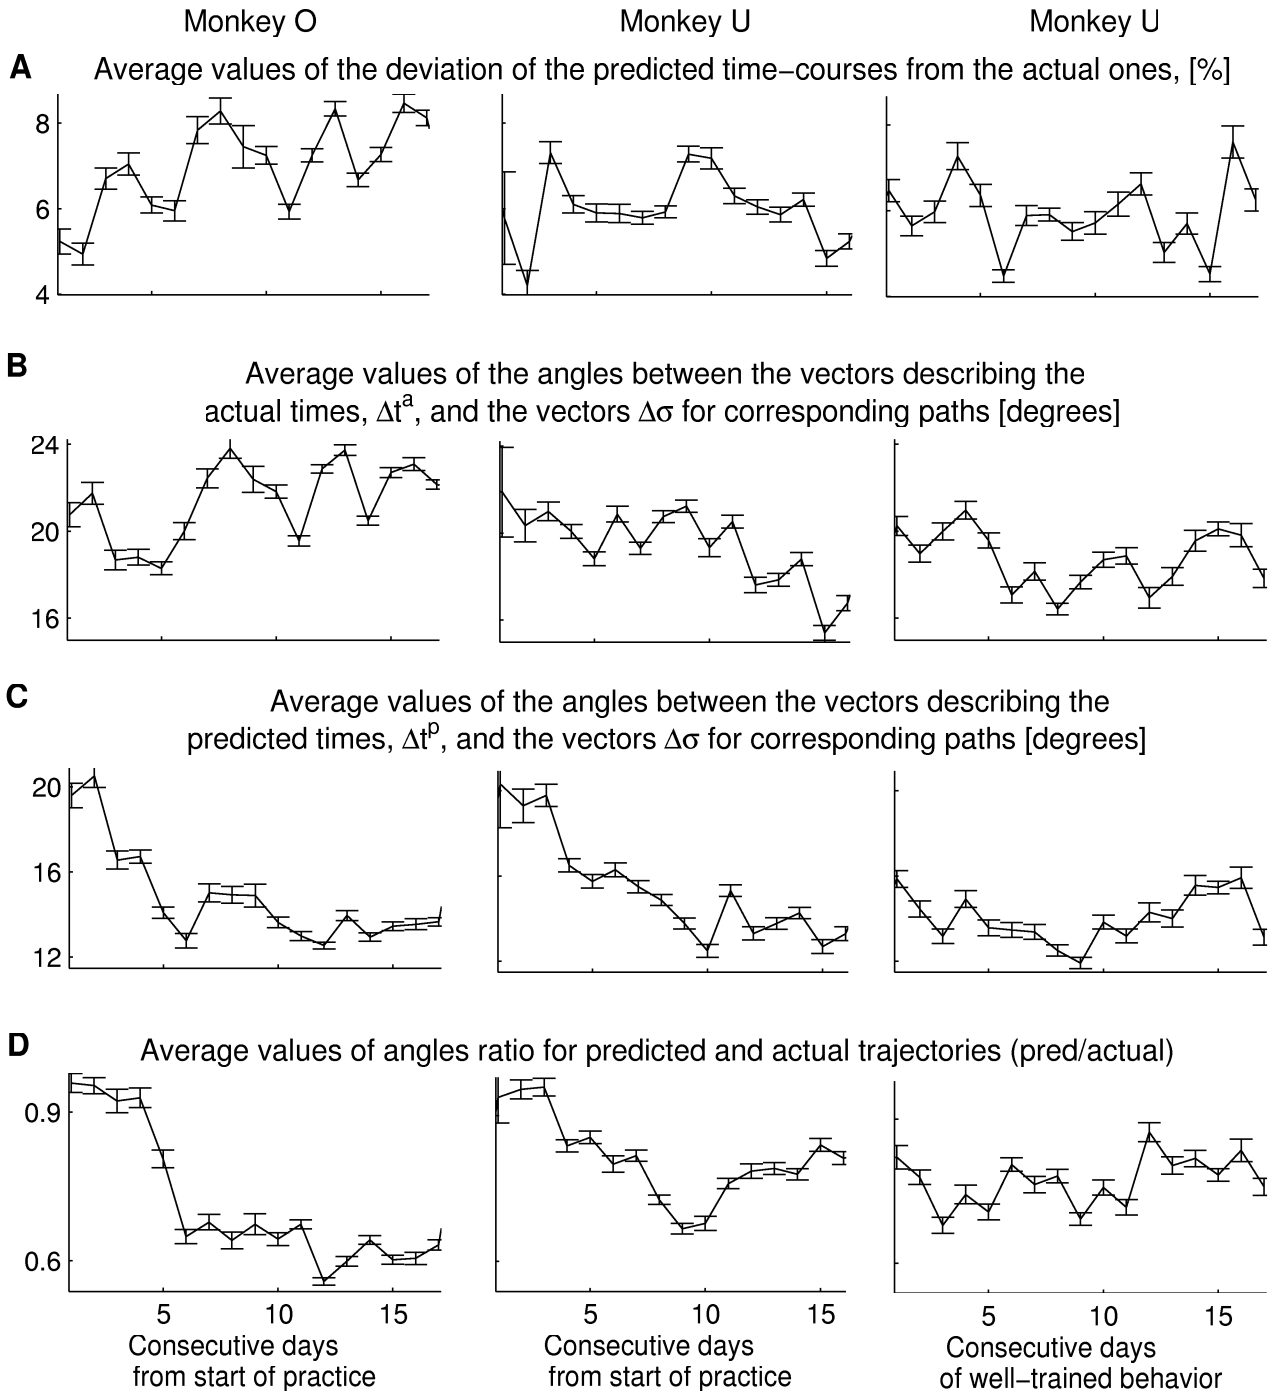

Supplement: pcbi.1000427.s007.pdf [file pcbi.1000427.s007.pdf]
