# Supplementary material for: A Compact Representation of Drawing Movements with Sequences of Parabolic Primitives
Source: PLOS journal article supplement (doi:10.1371/journal.pcbi.1000427), 2009-07-02

Two regular strokes within a sequence  $|\Delta\sigma|$ 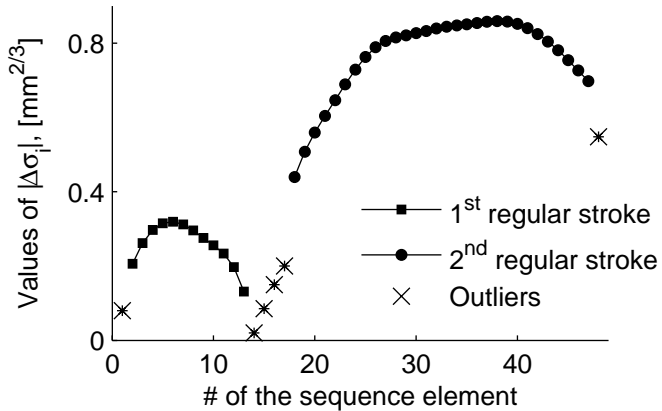

Regularized sequence

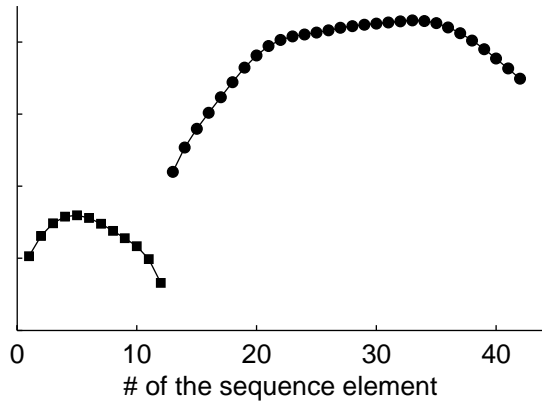

Supplement: S5 (10.1371/journal.pcbi.1000427.s005) [file journal.pcbi.1000427.s005]
