# Supplementary material for: A Compact Representation of Drawing Movements with Sequences of Parabolic Primitives
Source: PLOS journal article supplement (doi:10.1371/journal.pcbi.1000427), 2009-07-02

**A**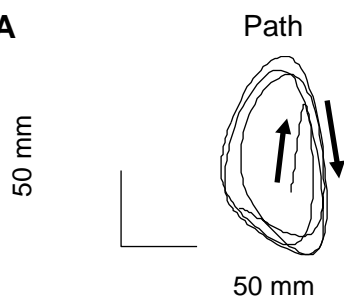**B** Actual and predicted time courses versus sample points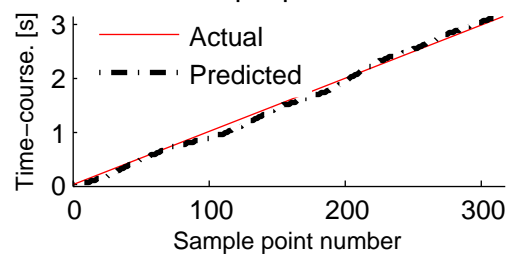**C**

Actual and predicted tangential velocity profiles for the recorded segment

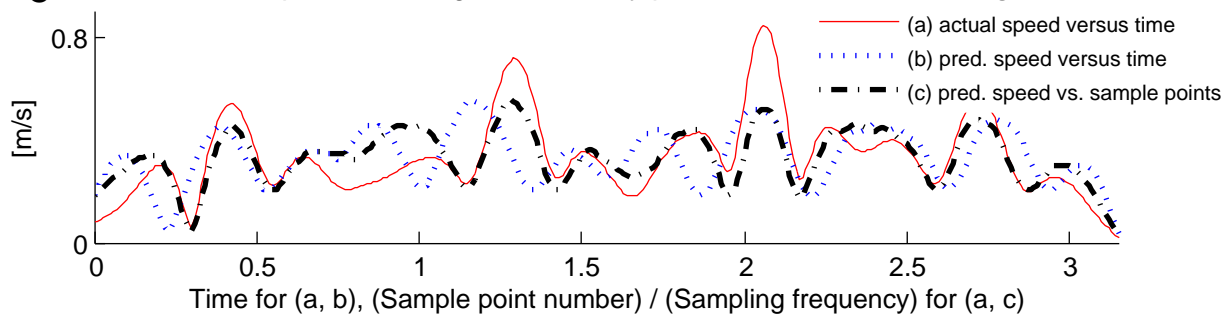**D**

The equiaffine parameters and the predicted time intervals for the above segment

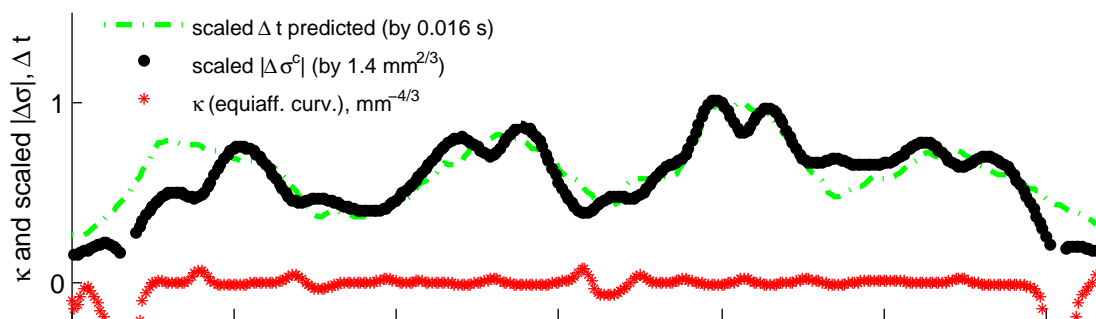**E**

Scaled actual and predicted equi-affine speeds

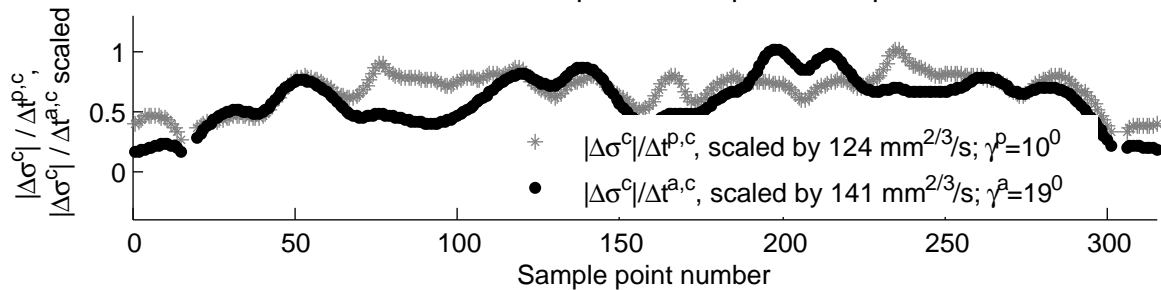

Supplement: S6 (10.1371/journal.pcbi.1000427.s006) [file journal.pcbi.1000427.s006]
